# Supplementary material
Source: PubMed Central journal article supplement (PMC7965039)
Supplement: 14-00911.pdf [file 14-00911.pdf]

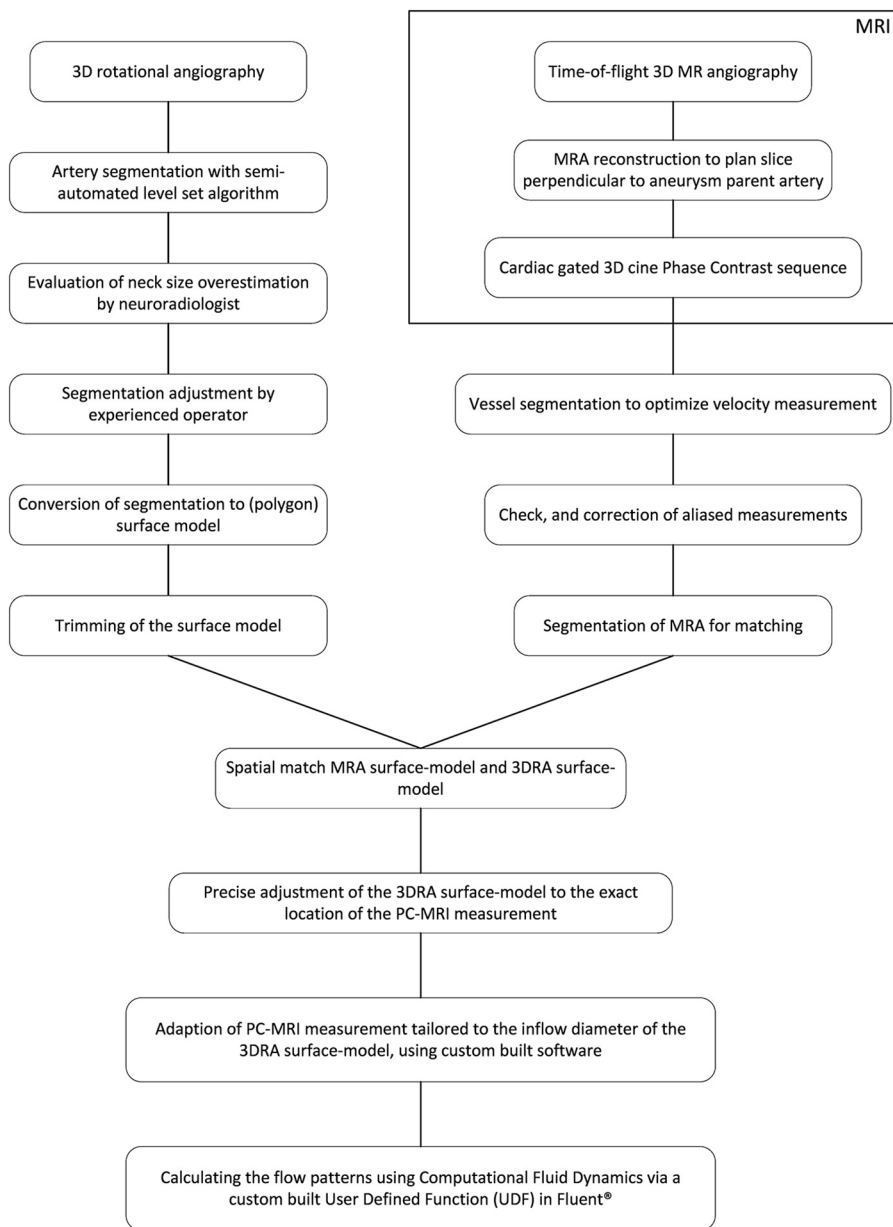

**ON-LINE FIG.** Image postprocessing pipeline.

**On-line Table 1: Univariate analysis for the relation between geometric and hemodynamic parameters and rupture status**

| Characteristics                              | Unruptured<br>(n = 62) | Ruptured<br>(n = 55) | Odds Ratio<br>(95% CI)   | Nagelkerke<br>R <sup>2</sup> | VIF <sup>a</sup> | P Value |
|----------------------------------------------|------------------------|----------------------|--------------------------|------------------------------|------------------|---------|
| Location                                     |                        |                      |                          |                              |                  |         |
| High-risk location <sup>b</sup>              | 22 (35%)               | 38 (69%)             | 4.06 (1.88–8.81)         | 0.173                        | 1.3              | <.001   |
| Geometric parameters                         |                        |                      |                          |                              |                  |         |
| Quantitative parameters                      |                        |                      |                          |                              |                  |         |
| Size (mean) (SD) (mm)                        | 7.35 (3.74)            | 6.64 (2.76)          | 0.94 (0.83–1.05)         | 0.015                        | 2.0              | NS      |
| Aspect ratio (median) (IQR)                  | 1.40 (1.08, 1.90)      | 1.69 (1.35, 2.07)    | 1.30 (0.78–2.17)         | 0.012                        | 1.6              | NS      |
| Sphericity (nonspheric)                      | 30 (48%)               | 24 (44%)             | 0.83 (0.40–1.71)         | 0.003                        | 1.1              | NS      |
| Qualitative parameters                       |                        |                      |                          |                              |                  |         |
| Presence of daughter sacs                    | 18 (29%)               | 30 (55%)             | 2.93 (1.37–6.29)         | 0.087                        | 1.5              | .006    |
| Aneurysm type (bifurcation)                  | 45 (73%)               | 45 (82%)             | 0.59 (0.24–1.42)         | 0.006                        | 1.3              | NS      |
| Hemodynamic parameters                       |                        |                      |                          |                              |                  |         |
| Quantitative parameters                      |                        |                      |                          |                              |                  |         |
| MeanWSS (median) (IQR)                       | 1.70 (1.25–3.10)       | 1.14 (0.57–2.46)     | 0.86 (0.71–1.04)         | 0.031                        | 3.1              | NS      |
| MaxWSS (median) (IQR)                        | 21.73 (13.05–37.72)    | 17.63 (7.94–38.37)   | 0.99 (0.98–1.01)         | 0.016                        | 2.5              | NS      |
| OSI (median) (IQR) <sup>a</sup>              | 0.01 (0.01–0.02)       | 0.02 (0.01–0.03)     | 1.02 (1.00–1.05)         | 0.064                        | 1.3              | NS      |
| Qualitative parameters                       |                        |                      |                          |                              |                  |         |
| Single inflow jet                            | 61 (98%)               | 53 (96%)             | 2.30 (0.20–26.11)        | 0.005                        | 1.8              | NS      |
| Concentrated inflow jet                      | 60 (97%)               | 48 (87%)             | 0.23 (0.05–1.15)         | 0.043                        | 2.2              | NS      |
| Unstable inflow jet                          | 1 (2%)                 | 10 (18%)             | 13.56 (1.67–109.75)      | 0.115                        | 1.6              | .015    |
| Vortex complexity (complex)                  | 20 (32%)               | 29 (53%)             | 2.34 (1.11–4.96)         | 0.056                        | 1.8              | .026    |
| Vortex stability (unstable)                  | 16 (26%)               | 22 (40%)             | 1.92 (0.88–4.20)         | 0.030                        | 2.0              | NS      |
| Flow-pattern category <sup>c</sup>           |                        |                      |                          |                              |                  |         |
| Simple stable                                | 38 (61%)               | 4 (7%)               | Reference: simple stable | 0.062                        | — <sup>d</sup>   |         |
| Simple unstable                              | 4 (7%)                 | 22 (40%)             | 1.73 (0.39–7.60)         |                              |                  | NS      |
| Complex stable                               | 8 (13%)                | 11 (20%)             | 2.38 (0.83–6.80)         |                              |                  | NS      |
| Complex unstable                             | 12 (19%)               | 18 (33%)             | 2.59 (1.05–6.37)         |                              |                  | .038    |
| Location of flow impingement at <sup>e</sup> |                        |                      |                          |                              |                  |         |
| Neck                                         | 23 (37%)               | 12 (22%)             | Reference: neck          | 0.051                        | 1.2              |         |
| Dome                                         | 19 (31%)               | 13 (24%)             | 1.31 (0.49–3.54)         |                              |                  |         |
| Body                                         | 20 (32%)               | 26 (47%)             | 2.49 (1.004–6.19)        |                              |                  | NS      |
| ND                                           | 0 (0%)                 | 4 (7%)               |                          |                              |                  | .049    |

**Note:**—OSI indicates oscillatory shear index; WSS, wall shear stress; ND, not detectable (impingement zone); VIF, variance inflation factor; IQR, interquartile range; NS, not significant; Max, maximum.

<sup>a</sup> The original values are multiplied by 10<sup>3</sup> to be analyzed statistically.

<sup>b</sup> High-risk location: anterior cerebral, posterior communicating, and posterior circulation arteries according to Greving et al.<sup>4</sup>

<sup>c</sup> Categorized flow patterns derived from vortex stability and complexity according to Cebral et al.<sup>8</sup>

<sup>d</sup> Value excluded from multicollinearity calculation.

<sup>e</sup> Location in the aneurysm sac, according to Cebral et al.<sup>9</sup>

**On-line Table 2: Interobserver variability for qualitatively scored parameters**

|                           | Agreement | ICC  |
|---------------------------|-----------|------|
| Presence of daughter sacs | 75%       | 0.51 |
| Aneurysm type             | 94%       | 0.87 |
| Single inflow jet         | 92%       | 0.27 |
| Concentrated inflow jet   | 89%       | 0.47 |
| Unstable inflow jet       | 79%       | 0.20 |
| Vortex complexity         | 86%       | 0.70 |
| Vortex stability          | 79%       | 0.47 |
| Flow patterns             | 73%       | 0.57 |

**Note:**—ICC indicates intraclass correlation coefficient.
